# Supplementary material
Source: PubMed Central journal article supplement (PMC5969477)
Supplement: CJN.09910917SupplementaryData.pdf [file CJN.09910917SupplementaryData.pdf]

Supplemental material is neither peer-reviewed nor thoroughly edited by CJASN. The authors alone are responsible for the accuracy and presentation of the material.

## **SUPPLEMENTAL MATERIAL**

**Title:** Opioid Analgesics and Adverse Outcomes among Hemodialysis Patients

**Authors:** Julie H. Ishida, MD, MAS<sup>1,2</sup>; Charles E. McCulloch, PhD<sup>3</sup>; Michael A. Steinman, MD<sup>4</sup>;  
Barbara A. Grimes, PhD<sup>3</sup>; Kirsten L. Johansen, MD<sup>1,2,3</sup>

**Supplemental Table 1.** Equianalgesic Dosing Calculations

**Supplemental Table 2.** International Classification of Diseases, Ninth Revision, Clinical Modification (ICD-9-CM) Diagnosis and Current Procedural Terminology (CPT) Codes for Altered Mental Status, Fall, and Fracture Ascertainment

**Supplemental Table 3.** International Classification of Diseases, Ninth Revision, Clinical Modification (ICD-9-CM) Diagnosis and Procedure Codes for Comorbidity Ascertainment

**Supplemental Table 4.** Risk of Altered Mental Status, Fall, and Fracture Among Adults Receiving Hemodialysis with Medicare Part D Coverage in 2011 by Opioid Dose and Agent (Low-Income Subsidy Sensitivity Analysis)

**Supplemental Table 5.** Risk of Altered Mental Status, Fall, and Fracture Among Adults Receiving Hemodialysis with Medicare Part D Coverage in 2011 by Opioid Dose and Agent (New User Analysis)

Supplemental material is neither peer-reviewed nor thoroughly edited by CJASN. The authors alone are responsible for the accuracy and presentation of the material.

**Supplemental Table 6.** Risk of Altered Mental Status, Fall, and Fracture Among Adults Receiving Hemodialysis with Medicare Part D Coverage in 2011 by Number of Concomitant Opioid Agents Accounting for Dose

**Supplemental Table 7.** Risk of Altered Mental Status, Fall, and Fracture Among Adults Receiving Hemodialysis with Medicare Part D Coverage in 2011 by Opioid Dose and Agent (Subgroup Analyses)

**Supplemental References.**

Supplemental material is neither peer-reviewed nor thoroughly edited by CJASN. The authors alone are responsible for the accuracy and presentation of the material.

**Supplemental Table 1: Equianalgesic Dosing Calculations**

| <b>Generic Name</b>     | <b>Route</b>                       | <b>Oral Morphine Equivalents</b> |
|-------------------------|------------------------------------|----------------------------------|
| BUPRENORPHINE           | PATCH,<br>TRANSDERMAL<br>WEEKLY    | Multiply dose in mcg/hr by 2.2   |
| BUPRENORPHINE HCL       | AMPUL (ML)                         | 75                               |
| BUPRENORPHINE HCL       | TABLET, SUBLINGUAL                 | 38.8                             |
| BUTORPHANOL<br>TARTRATE | AEROSOL, SPRAY<br>(ML)             | 15                               |
| BUTORPHANOL<br>TARTRATE | VIAL (SDV,MDV OR<br>ADDITIVE) (ML) | 15                               |
| CODEINE SULF            | TABLET                             | 0.1                              |
| FENTANYL                | PATCH,<br>TRANSDERMAL 72<br>HOURS  | Multiply dose in mcg/hr by 2.7   |
| FENTANYL CITRATE        | LOZENGE ON A<br>HANDLE             | Multiply dose in mcg by 0.1      |
| FENTANYL CITRATE        | TABLET,<br>EFFERVESCENT            | Multiply dose in mcg by 0.1      |
| FENTANYL CITRATE        | TABLET, SUBLINGUAL                 | Multiply dose in mcg by 0.1      |
| FENTANYL<br>CITRATE/PF  | AMPUL (ML)                         | Multiply dose in mcg by 0.2      |
| FENTANYL<br>CITRATE/PF  | VIAL (SDV,MDV OR<br>ADDITIVE) (ML) | Multiply dose in mcg by 0.2      |
| HYDROMORPHONE<br>HCL    | LIQUID (ML)                        | 5                                |
| HYDROMORPHONE<br>HCL    | SUPPOSITORY,<br>RECTAL             | 5                                |
| HYDROMORPHONE<br>HCL    | TABLET                             | 5                                |
| HYDROMORPHONE<br>HCL    | TABLET, EXTENDED<br>RELEASE 24 HR  | 5                                |
| HYDROMORPHONE<br>HCL    | VIAL (SDV,MDV OR<br>ADDITIVE) (ML) | 17.5                             |
| HYDROMORPHONE<br>HCL/PF | AMPUL (ML)                         | 17.5                             |
| HYDROMORPHONE<br>HCL/PF | DISPOSABLE SYRINGE<br>(ML)         | 17.5                             |
| HYDROMORPHONE<br>HCL/PF | VIAL (SDV,MDV OR<br>ADDITIVE) (ML) | 17.5                             |
| MEPERIDINE HCL          | SOLUTION, ORAL                     | 0.1                              |
| MEPERIDINE HCL          | TABLET                             | 0.1                              |
| MEPERIDINE HCL          | VIAL (SDV,MDV OR<br>ADDITIVE) (ML) | 0.4                              |
| MEPERIDINE HCL/PF       | AMPUL (ML)                         | 0.4                              |

Supplemental material is neither peer-reviewed nor thoroughly edited by CJASN. The authors alone are responsible for the accuracy and presentation of the material.

|                   |                                          |     |
|-------------------|------------------------------------------|-----|
| MEPERIDINE HCL/PF | DISPOSABLE SYRINGE (ML)                  | 0.4 |
| MEPERIDINE HCL/PF | VIAL (SDV,MDV OR ADDITIVE) (ML)          | 0.4 |
| METHADONE HCL     | CONCENTRATE, ORAL                        | 4.7 |
| METHADONE HCL     | SOLUTION, ORAL                           | 4.7 |
| METHADONE HCL     | TABLET                                   | 4.7 |
| MORPHINE SULFATE  | AMPUL (ML)                               | 3   |
| MORPHINE SULFATE  | CAPSULE, EXTENDED RELEASE PELLETS        | 1   |
| MORPHINE SULFATE  | CAPSULE,EXTENDED RELEASE MULTIPHASE 24HR | 1   |
| MORPHINE SULFATE  | DISPOSABLE SYRINGE (ML)                  | 3   |
| MORPHINE SULFATE  | SOLUTION, ORAL                           | 1   |
| MORPHINE SULFATE  | SUPPOSITORY, RECTAL                      | 1   |
| MORPHINE SULFATE  | TABLET                                   | 1   |
| MORPHINE SULFATE  | TABLET, EXTENDED RELEASE                 | 1   |
| MORPHINE SULFATE  | VIAL (SDV,MDV OR ADDITIVE) (ML)          | 3   |
| NALBUPHINE HCL    | AMPUL (ML)                               | 3   |
| OXYCODONE HCL     | CAPSULE (HARD, SOFT, ETC.)               | 1.5 |
| OXYCODONE HCL     | CONCENTRATE, ORAL                        | 1.5 |
| OXYCODONE HCL     | SOLUTION, ORAL                           | 1.5 |
| OXYCODONE HCL     | TABLET                                   | 1.5 |
| OXYCODONE HCL     | TABLET, EXTENDED RELEASE 12 HR           | 1.5 |
| OXYMORPHONE HCL   | TABLET                                   | 3   |
| OXYMORPHONE HCL   | TABLET, EXTENDED RELEASE 12 HR           | 3   |
| TAPENTADOL HCL    | TABLET                                   | 0.4 |
| TRAMADOL HCL      | TABLET                                   | 0.2 |
| TRAMADOL HCL      | TABLET, EXTENDED RELEASE 24 HR           | 0.2 |
| TRAMADOL HCL      | TABLET, RAPID DISSOLVE                   | 0.2 |
| TRAMADOL HCL      | TABLET,EXTENDED RELEASE MULTIPHASE 24 HR | 0.2 |

Supplemental material is neither peer-reviewed nor thoroughly edited by CJASN. The authors alone are responsible for the accuracy and presentation of the material.

|                                  |                               |      |
|----------------------------------|-------------------------------|------|
| ACETAMINOPHEN<br>WITH CODEINE    | ELIXIR                        | 0.1  |
| ACETAMINOPHEN<br>WITH CODEINE    | TABLET                        | 0.1  |
| HYDROCODONE<br>BIT/ACETAMINOPHEN | CAPSULE (HARD,<br>SOFT, ETC.) | 1.2  |
| HYDROCODONE<br>BIT/ACETAMINOPHEN | SOLUTION, ORAL                | 1.2  |
| HYDROCODONE<br>BIT/ACETAMINOPHEN | TABLET                        | 1.2  |
| OXYCODONE<br>HCL/ACETAMINOPHEN   | CAPSULE (HARD,<br>SOFT, ETC.) | 1.5  |
| OXYCODONE<br>HCL/ACETAMINOPHEN   | SOLUTION, ORAL                | 1.5  |
| OXYCODONE<br>HCL/ACETAMINOPHEN   | TABLET                        | 1.5  |
| PENTAZOCINE<br>HCL/ACETAMINOPHEN | TABLET                        | 0.6  |
| PROPOXYPHENE/ACET<br>AMINOPHEN   | TABLET                        | 0.15 |
| TRAMADOL<br>HCL/ACETAMINOPHEN    | TABLET                        | 0.2  |

**Supplemental Table 2: International Classification of Diseases, Ninth Revision, Clinical Modification (ICD-9-CM) Diagnosis and Current Procedural Terminology (CPT) Codes for Altered Mental Status, Fall, and Fracture Ascertainment**

| <b>Outcome</b>               | <b>ICD-9-CM</b>                                                                                                                                                                | <b>CPT</b>                                                                                                                                                                                                                                                                                                                                                                                                                                                                   |
|------------------------------|--------------------------------------------------------------------------------------------------------------------------------------------------------------------------------|------------------------------------------------------------------------------------------------------------------------------------------------------------------------------------------------------------------------------------------------------------------------------------------------------------------------------------------------------------------------------------------------------------------------------------------------------------------------------|
| <i>Altered mental status</i> | 292.11, 292.12, 292.2, 292.81, 292.84, 292.89, 292.9, 293.0, 293.1, 298.9, 348.30, 348.39, 349.82, 760.72, 760.77, 780.02, 780.09, 780.1, 780.97                               |                                                                                                                                                                                                                                                                                                                                                                                                                                                                              |
| <i>Fall</i>                  | E880.0, E880.1, E880.9, E884.9, E884.2, E884.3, E884.4, E884.5, E884.6, E885.0, E885.9, E888.0, E888.1, E888.8, E888.9                                                         |                                                                                                                                                                                                                                                                                                                                                                                                                                                                              |
| <i>Fracture</i>              |                                                                                                                                                                                |                                                                                                                                                                                                                                                                                                                                                                                                                                                                              |
| Hip/femur                    | 733.14, 733.15, 820.xx, 821.xx                                                                                                                                                 | 27125, 27220, 27222, 27226, 27227, 27228, 27230, 27232, 27235, 27236, 27238, 27240, 27244, 27245, 27246, 27248, 27254, 27500, 27501, 27502, 27503, 27506, 27507, 27508, 27509, 27510, 27511, 27513, 27514                                                                                                                                                                                                                                                                    |
| Pelvis                       | 808.xx                                                                                                                                                                         | 27190, 27193, 27194, 27215, 27216, 27217, 27218, 27200, 27202                                                                                                                                                                                                                                                                                                                                                                                                                |
| Leg/foot                     | 733.16 (path tibia), 822.xx (patella), 823.xx (tibia & fibula), 824.xx (ankle), 825.xx (tarsal, metatarsal), 826.xx (phalanges)                                                | 27350, 27520, 27524, 27530, 27532, 27535, 27536, 27538, 27540, 27750, 27752, 27756, 27758, 27759, 27760, 27762, 27766, 27767, 27768, 27769, 27780, 27781, 27784, 27786, 27788, 27792, 27808, 27810, 27814, 27816, 27818, 27822, 27823, 27824, 27825, 27826, 27827, 27828, 28315, 28400, 28405, 28406, 28415, 28420, 28430, 28435, 28436, 28445, 28450, 28455, 28456, 28465, 28470, 28475, 28476, 28485, 28490, 28495, 28496, 28505, 28510, 28515, 28525, 29851, 29855, 29856 |
| Arm/hand                     | 733.11 (path humerus), 733.12 (path radius), 812.xx (humerus), 813.xx (radius & ulna), 814.xx (carpal bone, wrist), 815.xx (metacarpal), 816.xx (phalanges), 817.xx (multiple) | 23600, 23605, 23610, 23615, 23616, 23620, 23625, 23630, 23665, 23670, 23675, 23680, 24500, 24505, 24506, 24510, 24515, 24516, 24530, 24531, 24535, 24536, 24538, 24540, 24542, 24545, 24546, 24560, 24565, 24566, 24570, 24575, 24576, 24577, 24579, 24581, 24582, 24583, 24585, 24586, 24587, 24588, 24620, 24625, 24635,                                                                                                                                                   |

Supplemental material is neither peer-reviewed nor thoroughly edited by CJASN. The authors alone are responsible for the accuracy and presentation of the material.

|       |                                                                               |                                                                                                                                                                                                                                                                                                                                                                                                                                                                       |
|-------|-------------------------------------------------------------------------------|-----------------------------------------------------------------------------------------------------------------------------------------------------------------------------------------------------------------------------------------------------------------------------------------------------------------------------------------------------------------------------------------------------------------------------------------------------------------------|
|       |                                                                               | 24650, 24655, 24660, 24665, 24666, 24670, 24675, 24680, 24685, 25500, 25505, 25510, 25514, 25515, 25520, 25525, 25526, 25530, 25535, 25540, 25541, 25545, 25560, 25565, 25570, 25574, 25575, 25600, 25604, 25605, 25606, 25607, 25608, 25609, 25622, 25624, 25628, 25630, 25635, 25645, 25650, 25651, 25652, 25680, 25685, 26600, 26605, 26607, 26608, 26615, 26645, 26650, 26665, 26720, 26725, 26727, 26735, 26740, 26742, 26746, 26750, 26755, 26756, 26765, 29847 |
| Axial | 807.0x-807.1x, 807.2-807.3 (ribs/sternum); 810.xx, 811.xx (clavicle, scapula) | 21800, 21820, 23500, 23505, 23515, 23570, 23575, 23585                                                                                                                                                                                                                                                                                                                                                                                                                |

Fracture for a given type required the presence of both an ICD-9-CM diagnosis code and CPT code.<sup>1-</sup>  
<sup>5</sup> In order to maximize the ability to ascertain incident fractures, we excluded vertebral fractures and required that no fracture of a given type occurred within the previous 30 days.<sup>6</sup>

Supplemental material is neither peer-reviewed nor thoroughly edited by CJASN. The authors alone are responsible for the accuracy and presentation of the material.

**Supplemental Table 3: International Classification of Diseases, Ninth Revision, Clinical Modification (ICD-9-CM) Diagnosis and Procedure Codes for Comorbidity Ascertainment**

| <b>Comorbidity</b>                    | <b>ICD-9 Codes</b>                                                                                                                              |
|---------------------------------------|-------------------------------------------------------------------------------------------------------------------------------------------------|
| Alcohol dependence                    | 291.x, 303.x, 305.x                                                                                                                             |
| Coronary artery disease               | 00.66, 36.0x, 410.x, 411.x, 413.x                                                                                                               |
| Cancer                                | 140.x-165.x, 170.x-172.x, 174.x, 175.x, 180.x-209.x, 238.6, 273.3                                                                               |
| Other cardiac disease                 | v42.2, v43.3, 394.x-397.1, 424.x, 746.3-746.6                                                                                                   |
| Dysrhythmia                           | 37.7x, 37.8x, 37.9x, v45.00, v45.01, v45.02, v45.09, v53.31, v53.32, 426.x, 427.0, 427.1, 427.20, 427.3x, 427.4x, 427.81, 427.9, 996.01, 996.04 |
| Congestive heart failure              | 398.91, 402.01, 402.11, 402.91, 404.01, 404.03, 404.13, 404.91, 428.x                                                                           |
| Cerebrovascular disease               | 433.x, 434.x, 435.x, 436.00, 437.x, 438.x                                                                                                       |
| Diabetes                              | 249.x, 250.x, 357.2, 362.0x                                                                                                                     |
| Drug dependence                       | 292.x, 304.x, 305.x                                                                                                                             |
| Opioid dependence                     | 304.x, 305.5                                                                                                                                    |
| Hypertension                          | 401.0, 401.1, 401.9, 402.x, 403.x, 404.x, 405.x                                                                                                 |
| Chronic obstructive pulmonary disease | 490, 491.x-496                                                                                                                                  |
| Peripheral vascular disease           | 38.03, 38.04, 38.05, 38.08, 38.33-38.48, 39.22-39.29, v43.4, 440.2x, 440.3x, 440.4x, 441.x, 443.x, 445.x, 447.10, 557.10, 557.90                |
| Tobacco dependence                    | 305.1x                                                                                                                                          |
| Liver disease                         | v42.7, 070.x, 456.1, 456.21, 570-573.x                                                                                                          |
| Dementia                              | 290.x, 294.1x, 331.x                                                                                                                            |
| Depression                            | 296.2x, 296.3x, 296.5x, 296.82, 300.40, 301.12, 309.0, 309.10, 311                                                                              |
| Seizures/epilepsy                     | 345.x                                                                                                                                           |
| Osteoporosis                          | 731.0, 733.0, 733.00, 733.01, 733.02, 733.03, 733.09, 733.7                                                                                     |
| Osteopenia                            | 733.90                                                                                                                                          |



Supplemental material is neither peer-reviewed nor thoroughly edited by CJASN. The authors alone are responsible for the accuracy and presentation of the material.

**Supplemental Table 4: Risk of Altered Mental Status, Fall, and Fracture Among Adults Receiving Hemodialysis with Medicare Part D Coverage in 2011 by Opioid Dose and Agent (Low-Income Subsidy Sensitivity Analysis)**

|                                 | Altered Mental Status |                | Fall               |                | Fracture           |                |
|---------------------------------|-----------------------|----------------|--------------------|----------------|--------------------|----------------|
|                                 | <i>HR (95% CI)</i>    | <i>p-value</i> | <i>HR (95% CI)</i> | <i>p-value</i> | <i>HR (95% CI)</i> | <i>p-value</i> |
| <b>Opioid Dose</b>              |                       |                |                    |                |                    |                |
| <i>Categorical:</i>             |                       |                |                    |                |                    |                |
| None                            | 1.00 (ref)            |                | 1.00 (ref)         |                | 1.00 (ref)         |                |
| Lower Dose <sup>a</sup>         | 1.23 (1.18-1.29)      | <.001          | 1.24 (1.16-1.32)   | <.001          | 1.43 (1.31-1.55)   | <.001          |
| Higher Dose <sup>b</sup>        | 1.63 (1.53-1.75)      | <.001          | 1.41 (1.27-1.57)   | <.001          | 1.66 (1.44-1.92)   | <.001          |
|                                 |                       |                |                    |                |                    |                |
| <i>Continuous:</i>              |                       |                |                    |                |                    |                |
| Total Opioid Dose (per 60 mg)   | 1.27 (1.24-1.31)      | <.001          | 1.04 (1.03-1.05)   | <.001          | 1.04 (1.04-1.05)   | <.001          |
|                                 |                       |                |                    |                |                    |                |
| <b>Opioid Agent (per 60 mg)</b> |                       |                |                    |                |                    |                |
| <i>Recommended:</i>             |                       |                |                    |                |                    |                |
| None                            | 1.00 (ref)            |                | 1.00 (ref)         |                | 1.00 (ref)         |                |
| Hydromorphone                   | 1.39 (1.23-1.57)      | <.001          | 1.02 (0.99-1.04)   | 0.16           | 1.03 (1.02-1.04)   | <0.001         |
| Fentanyl                        | 1.15 (1.07-1.23)      | <.001          | 1.02 (0.92-1.14)   | 0.63           | 1.02 (0.88-1.19)   | 0.74           |
| Methadone                       | 1.14 (1.01-1.29)      | 0.04           | 1.12 (0.96-1.31)   | 0.15           | 1.06 (0.84-1.34)   | 0.63           |
|                                 |                       |                |                    |                |                    |                |
| <i>Use with Caution:</i>        |                       |                |                    |                |                    |                |
| Hydrocodone                     | 1.34 (1.25-1.43)      | <.001          | 1.32 (1.26-1.40)   | <.001          | 1.39 (1.30-1.47)   | <.001          |
| Oxycodone                       | 1.29 (1.23-1.36)      | <.001          | 1.13 (1.05-1.22)   | 0.001          | 1.27 (1.20-1.32)   | <.001          |
| Tramadol                        | 1.43 (1.25-1.62)      | <.001          | 1.34 (1.11-1.63)   | 0.003          | 1.60 (1.35-1.91)   | <.001          |
|                                 |                       |                |                    |                |                    |                |
| <i>Avoid:</i>                   |                       |                |                    |                |                    |                |
| Codeine                         | 3.80 (2.17-6.64)      | <.001          | 1.22 (0.46-3.17)   | 0.69           | 3.05 (0.96-9.57)   | 0.06           |
| Morphine                        | 1.39 (1.25-1.53)      | <.001          | 1.17 (1.01-1.36)   | 0.04           | 1.07 (0.84-1.37)   | 0.58           |

Abbreviations: HR = hazard ratio, CI = confidence interval

<sup>a</sup>Periods of lower dose (0 < average daily total dose ≤60 mg oral morphine equivalents) opioid exposure

<sup>b</sup>Periods of higher dose (average daily total dose >60 mg oral morphine equivalents) opioid exposure

Based on 108,901 (77%) of the cohort that received the low-income subsidy for the entire study duration.

Results are adjusted for age, sex, race, duration on dialysis, network, body mass index, alcohol dependence, coronary artery disease, cancer, other cardiac disease, dysrhythmia, congestive heart failure, cerebrovascular disease, diabetes, drug dependence, opioid dependence, hypertension, inability to ambulate, inability to transfer, chronic obstructive pulmonary disease, peripheral vascular disease, tobacco dependence, liver disease, dementia, depression, seizures/epilepsy, osteoporosis, osteopenia, skilled nursing facility resident, medication burden, number of hypertensive medications, and concomitant medications.

Supplemental material is neither peer-reviewed nor thoroughly edited by CJASN. The authors alone are responsible for the accuracy and presentation of the material.

**Supplemental Table 5: Risk of Altered Mental Status, Fall, and Fracture Among Adults Receiving Hemodialysis with Medicare Part D Coverage in 2011 by Opioid Dose and Agent (New User Analysis)**

|                               | Altered Mental Status |                | Fall               |                | Fracture           |                |
|-------------------------------|-----------------------|----------------|--------------------|----------------|--------------------|----------------|
|                               | <i>HR (95% CI)</i>    | <i>p-value</i> | <i>HR (95% CI)</i> | <i>p-value</i> | <i>HR (95% CI)</i> | <i>p-value</i> |
| <b>Opioid Dose</b>            |                       |                |                    |                |                    |                |
| <i>Categorical:</i>           |                       |                |                    |                |                    |                |
| None                          | 1.00 (ref)            |                | 1.00 (ref)         |                | 1.00 (ref)         |                |
| Lower Dose <sup>a</sup>       | 2.10 (1.91-2.31)      | <.001          | 1.66 (1.44-1.91)   | <.001          | 2.31 (1.95-2.75)   | <.001          |
| Higher Dose <sup>b</sup>      | 2.95 (2.39-3.65)      | <.001          | 1.78 (1.22-2.61)   | 0.003          | 1.76 (1.04-3.00)   | 0.04           |
|                               |                       |                |                    |                |                    |                |
| <i>Continuous:</i>            |                       |                |                    |                |                    |                |
| Total Opioid Dose (per 60 mg) | 2.08 (1.94-2.23)      | <.001          | 1.53 (1.41-1.64)   | <.001          | 1.63 (1.53-1.74)   | <.001          |

Abbreviations: HR = hazard ratio, CI = confidence interval

<sup>a</sup>Periods of lower dose (0 < average daily total dose ≤60 mg oral morphine equivalents) opioid exposure

<sup>b</sup>Periods of higher dose (average daily total dose >60 mg oral morphine equivalents) opioid exposure

Results are adjusted for age, sex, race, duration on dialysis, network, body mass index, alcohol dependence, coronary artery disease, cancer, other cardiac disease, dysrhythmia, congestive heart failure, cerebrovascular disease, diabetes, drug dependence, opioid dependence, hypertension, inability to ambulate, inability to transfer, chronic obstructive pulmonary disease, peripheral vascular disease, tobacco dependence, liver disease, dementia, depression, seizures/epilepsy, osteoporosis, osteopenia, skilled nursing facility resident, medication burden, number of hypertensive medications, and concomitant medications.

Supplemental material is neither peer-reviewed nor thoroughly edited by CJASN. The authors alone are responsible for the accuracy and presentation of the material.

**Supplemental Table 6: Risk of Altered Mental Status, Fall, and Fracture Among Adults Receiving Hemodialysis with Medicare Part D Coverage in 2011 by Number of Concomitant Opioid Agents Accounting for Dose**

|                                                 | Altered Mental Status |                | Fall               |                | Fracture           |                |
|-------------------------------------------------|-----------------------|----------------|--------------------|----------------|--------------------|----------------|
|                                                 | <i>HR (95% CI)</i>    | <i>p-value</i> | <i>HR (95% CI)</i> | <i>p-value</i> | <i>HR (95% CI)</i> | <i>p-value</i> |
| <b>Total Opioid Dose</b> (per 60 mg)            |                       |                |                    |                |                    |                |
| <b>Concomitant Number of Opioid Medications</b> |                       |                |                    |                |                    |                |
| 1                                               | 1.31 (1.27-1.36)      | <.001          | 1.04 (1.03-1.04)   | <.001          | 1.04 (1.04-1.05)   | <.001          |
| 2                                               | 1.27 (1.21-1.32)      | <.001          | 1.13 (1.11-1.16)   | <.001          | 1.13 (1.10-1.17)   | <.001          |
| ≥3                                              | 1.39 (1.22-1.59)      | <.001          | 1.04 (0.82-1.32)   | 0.75           | 1.02 (0.74-1.43)   | 0.89           |

Abbreviations: HR = hazard ratio, CI = confidence interval

<sup>a</sup>Periods of lower dose (0 < average daily total dose ≤60 mg oral morphine equivalents) opioid exposure

<sup>b</sup>Periods of higher dose (average daily total dose >60 mg oral morphine equivalents) opioid exposure

Results are adjusted for age, sex, race, duration on dialysis, network, body mass index, alcohol dependence, coronary artery disease, cancer, other cardiac disease, dysrhythmia, congestive heart failure, cerebrovascular disease, diabetes, drug dependence, opioid dependence, hypertension, inability to ambulate, inability to transfer, chronic obstructive pulmonary disease, peripheral vascular disease, tobacco dependence, liver disease, dementia, depression, seizures/epilepsy, osteoporosis, osteopenia, skilled nursing facility resident, medication burden, number of hypertensive medications, and concomitant medications.

Supplemental material is neither peer-reviewed nor thoroughly edited by CJASN. The authors alone are responsible for the accuracy and presentation of the material.

**Supplemental Table 7: Risk of Altered Mental Status, Fall, and Fracture Among Adults Receiving Hemodialysis with Medicare Part D Coverage in 2011 by Opioid Dose and Agent (Subgroup Analyses)**

|                           | Altered Mental Status                              |                                                     |                                                   | Fall                                               |                                                     |                                                   | Fracture                                           |                                                     |                                                   |
|---------------------------|----------------------------------------------------|-----------------------------------------------------|---------------------------------------------------|----------------------------------------------------|-----------------------------------------------------|---------------------------------------------------|----------------------------------------------------|-----------------------------------------------------|---------------------------------------------------|
|                           | Lower Dose <sup>a</sup><br>vs. None<br>HR (95% CI) | Higher Dose <sup>b</sup><br>vs. None<br>HR (95% CI) | <i>p</i> -value<br><i>inter-</i><br><i>action</i> | Lower Dose <sup>a</sup><br>vs. None<br>HR (95% CI) | Higher Dose <sup>b</sup><br>vs. None<br>HR (95% CI) | <i>p</i> -value<br><i>inter-</i><br><i>action</i> | Lower Dose <sup>a</sup><br>vs. None<br>HR (95% CI) | Higher Dose <sup>b</sup><br>vs. None<br>HR (95% CI) | <i>p</i> -value<br><i>inter-</i><br><i>action</i> |
| Age (years)               |                                                    |                                                     |                                                   |                                                    |                                                     |                                                   |                                                    |                                                     |                                                   |
| ≥65                       | 1.28<br>(1.20-1.35)                                | 1.57<br>(1.42-1.75)                                 | 0.46                                              | 1.22<br>(1.12-1.33)                                | 1.33<br>(1.13-1.57)                                 | 0.24                                              | 1.35<br>(1.21-1.50)                                | 1.66<br>(1.37-2.02)                                 | 0.32                                              |
| <65                       | 1.28<br>(1.21-1.36)                                | 1.71<br>(1.58-1.86)                                 |                                                   | 1.33<br>(1.22-1.44)                                | 1.49<br>(1.32-1.69)                                 |                                                   | 1.49<br>(1.33-1.68)                                | 1.53<br>(1.28-1.84)                                 |                                                   |
| Sex                       |                                                    |                                                     |                                                   |                                                    |                                                     |                                                   |                                                    |                                                     |                                                   |
| Male                      | 1.28<br>(1.20-1.36)                                | 1.60<br>(1.45-1.76)                                 | 0.52                                              | 1.32<br>(1.21-1.45)                                | 1.64<br>(1.42-1.90)                                 | 0.07                                              | 1.55<br>(1.37-1.76)                                | 1.72<br>(1.40-2.12)                                 | 0.30                                              |
| Female                    | 1.29<br>(1.22-1.36)                                | 1.72<br>(1.58-1.88)                                 |                                                   | 1.26<br>(1.17-1.36)                                | 1.32<br>(1.15-1.51)                                 |                                                   | 1.37<br>(1.24-1.52)                                | 1.60<br>(1.35-1.91)                                 |                                                   |
| Race                      |                                                    |                                                     |                                                   |                                                    |                                                     |                                                   |                                                    |                                                     |                                                   |
| White                     | 1.33<br>(1.26-1.41)                                | 1.85<br>(1.70-2.01)                                 | <.001                                             | 1.29<br>(1.20-1.40)                                | 1.45<br>(1.28-1.65)                                 | 0.09                                              | 1.41<br>(1.28-1.56)                                | 1.64<br>(1.40-1.92)                                 | 0.21                                              |
| Black                     | 1.20<br>(1.13-1.27)                                | 1.42<br>(1.28-1.58)                                 |                                                   | 1.22<br>(1.11-1.34)                                | 1.41<br>(1.19-1.66)                                 |                                                   | 1.42<br>(1.23-1.64)                                | 1.54<br>(1.17-2.01)                                 |                                                   |
| Other                     | 1.62<br>(1.29-2.60)                                | 1.83<br>(1.29-2.60)                                 |                                                   | 1.76<br>(1.37-2.26)                                | 1.96<br>(1.19-3.24)                                 |                                                   | 1.94<br>(1.40-2.68)                                | 2.75<br>(1.50-5.07)                                 |                                                   |
| Dialysis Duration (years) |                                                    |                                                     |                                                   |                                                    |                                                     |                                                   |                                                    |                                                     |                                                   |
| ≥4                        | 1.30<br>(1.23-1.38)                                | 1.64<br>(1.50-1.79)                                 | 0.59                                              | 1.32<br>(1.22-1.43)                                | 1.31<br>(1.14-1.51)                                 | 0.04                                              | 1.42<br>(1.27-1.59)                                | 1.39<br>(1.14-1.70)                                 | 0.06                                              |
| <4                        | 1.26<br>(1.19-1.34)                                | 1.70<br>(1.55-1.86)                                 |                                                   | 1.24<br>(1.14-1.35)                                | 1.61<br>(1.41-1.84)                                 |                                                   | 1.46<br>(1.31-1.63)                                | 1.91<br>(1.60-2.28)                                 |                                                   |

Abbreviations: HR = hazard ratio, CI = confidence interval

<sup>a</sup>Periods of lower dose (0 < average daily total dose ≤60 mg oral morphine equivalents) opioid exposure

<sup>b</sup>Periods of higher dose (average daily total dose >60 mg oral morphine equivalents) opioid exposure

Supplemental material is neither peer-reviewed nor thoroughly edited by CJASN. The authors alone are responsible for the accuracy and presentation of the material.

Results are adjusted for age, sex, race, duration on dialysis, network, body mass index, alcohol dependence, coronary artery disease, cancer, other cardiac disease, dysrhythmia, congestive heart failure, cerebrovascular disease, diabetes, drug dependence, opioid dependence, hypertension, inability to ambulate, inability to transfer, chronic obstructive pulmonary disease, peripheral vascular disease, tobacco dependence, liver disease, dementia, depression, seizures/epilepsy, osteoporosis, osteopenia, skilled nursing facility resident, medication burden, number of hypertensive medications, and concomitant medications.

Supplemental material is neither peer-reviewed nor thoroughly edited by CJASN. The authors alone are responsible for the accuracy and presentation of the material.

### **Supplemental References.**

1. Ishani A, Liu J, Wetmore JB, et al. Clinical outcomes after parathyroidectomy in a nationwide cohort of patients on hemodialysis. *Clin J Am Soc Nephrol.* 2015;10(1):90-97.
2. Wetmore JB, Liu J, Wirtz HS, et al. Geovariation in fracture risk among patients receiving hemodialysis. *Clin J Am Soc Nephrol.* 2016;11(8):1413-1421.
3. Delgado C, Shieh S, Grimes B, et al. Association of self-reported frailty with falls and fractures among patients new to dialysis. *Am J Nephrol.* 2015;42(2):134-140.
4. Doan QV, Gleeson M, Kim J, Borker R, Griffiths R, Dubois RW. Economic burden of cardiovascular events and fractures among patients with end-stage renal disease. *Curr Med Res Opin.* 2007;23(7):1561-1569.
5. Danese MD, Kim J, Doan QV, Dylan M, Griffiths R, Chertow GM. PTH and the risks for hip, vertebral, and pelvic fractures among patients on dialysis. *Am J Kidney Dis.* 2006;47(1):149-156.
6. Saunders KW, Dunn KM, Merrill JO, et al. Relationship of opioid use and dosage levels to fractures in older chronic pain patients. *J Gen Intern Med.* 2010;25(4):310-315.
